# Supplementary material for: Translation, cross-cultural adaptation and validation of the Slovenian version of Harris Hip Score
Source: Springer Nature journal article supplement (doi:10.1186/s12955-020-01592-w), 2020-10-08
Supplement: MOESM1 [file 18463618]

## Harrisova kolčna lestvica (HHS)

Ime pacienta: \_\_\_\_\_

Oboleli kolk: D L (obkroži)

Datum: : \_\_\_\_\_

1. del

### Bolečina

|                                                                                                                                                                                      |     |
|--------------------------------------------------------------------------------------------------------------------------------------------------------------------------------------|-----|
| <input type="checkbox"/> Je ni ali je ne opazim                                                                                                                                      | +44 |
| <input type="checkbox"/> Rahla, občasna, ne vpliva na izvedbo dejavnosti                                                                                                             | +40 |
| <input type="checkbox"/> Blaga bolečina brez vpliva na vsakodnevne dejavnosti. Ob nevsakdanjih aktivnostih se redko pojavi bolečina, ki potrebuje uporabo protibolečinskega zdravila | +30 |
| <input type="checkbox"/> Zmerna, še znosna bolečina. Omejuje izvedbo vsakodnevnih dejavnosti in dela. Občasno je potrebno močnejše protibolečinsko zdravilo.                         | +20 |
| <input type="checkbox"/> Močna bolečina, ki resno omejuje izvedbo dejavnosti/dela.                                                                                                   | +10 |
| <input type="checkbox"/> Popolnoma nemočen zaradi bolečine, nepomičen, vezan na posteljo                                                                                             | +0  |

### Sedenje

|                                                                   |    |
|-------------------------------------------------------------------|----|
| <input type="checkbox"/> Brez težav na običajnem stolu za eno uro | +5 |
| <input type="checkbox"/> Na visokem stolu za 30 minut             | +3 |
| <input type="checkbox"/> Nezmožen sedenja v stolu                 | +0 |

### Uporaba javnega prevoza

|                             |    |
|-----------------------------|----|
| <input type="checkbox"/> Da | +1 |
| <input type="checkbox"/> Ne | +0 |

### Šepanje

|                                                       |     |
|-------------------------------------------------------|-----|
| <input type="checkbox"/> Ni                           | +11 |
| <input type="checkbox"/> Rahlo                        | +8  |
| <input type="checkbox"/> Zmerno                       | +5  |
| <input type="checkbox"/> Hudo oziroma nezmožnost hoje | +0  |

### Stopnice

|                                                       |    |
|-------------------------------------------------------|----|
| <input type="checkbox"/> Normalno brez uporabe ograje | +4 |
| <input type="checkbox"/> Normalno z uporabo ograje    | +2 |
| <input type="checkbox"/> Na kakršen koli način        | +1 |
| <input type="checkbox"/> Nezmožen hoje po stopnicah   | +0 |

### Opora

|                                                               |     |
|---------------------------------------------------------------|-----|
| <input type="checkbox"/> Ni potrebna                          | +11 |
| <input type="checkbox"/> Palica/pohodne palice za daljšo hojo | +7  |
| <input type="checkbox"/> Palica/pohodne palice večinoma       | +5  |
| <input type="checkbox"/> Ena bergla                           | +3  |
| <input type="checkbox"/> Dve palici/pohodne palice            | +2  |
| <input type="checkbox"/> Dve bergli ali nezmožnost hoje       | +0  |

### Obuvanje nogavic in čevljev

|                                     |    |
|-------------------------------------|----|
| <input type="checkbox"/> Brez težav | +4 |
| <input type="checkbox"/> S težavo   | +2 |
| <input type="checkbox"/> Ni možno   | +0 |

### Prehojena razdalja

|                                                            |     |
|------------------------------------------------------------|-----|
| <input type="checkbox"/> Neomejena                         | +11 |
| <input type="checkbox"/> Nekaj ulic (30 minut)             | +8  |
| <input type="checkbox"/> 2-3 ulice (10-15 minut)           | +5  |
| <input type="checkbox"/> Samo po stanovanju                | +2  |
| <input type="checkbox"/> Samo na postelji oziroma na stolu | +0  |

2. del

Ali ima pacient vse naštetu? (vse da=4, manj od 4=0)

|                             |                                                                                                                                       |
|-----------------------------|---------------------------------------------------------------------------------------------------------------------------------------|
| <input type="checkbox"/> da | manj kot 30° fiksirane fleksije                                                                                                       |
| <input type="checkbox"/> ne | manj kot 10° fiksirane addukcije<br>manj kot 10° fiksirane notranje rotacije in ekstenzije<br>razlika v dolžini udov manjša od 3,2 cm |

3. del.

Obseg gibljivosti (normalni obseg giba)

Fleksija (140°): \_\_\_\_\_

Abdukcija (40°): \_\_\_\_\_

Addukcija (40°): \_\_\_\_\_

Zunanja rotacija (40°): \_\_\_\_\_

Notranja rotacija (40°): \_\_\_\_\_

**Točkovanje:**

Obseg giba: \_\_\_\_\_

Popolni obseg giba: \_\_\_\_\_

211° -300° =5 točk

161° -210° =4 točke

101° -160° =3 točke

61° -100° =2 točki

31° -60° = 1 točka

0° -30° = 0 točke

Dosežene točke gibljivosti: \_\_\_\_\_

Skupne točke Harrisove lestvice kolka: \_\_\_\_\_ točk
